# Supplementary material for: CD39 delineates chimeric antigen receptor regulatory T cell subsets with distinct cytotoxic & regulatory functions against human islets
Source: Frontiers journal article supplement (doi:10.3389/fimmu.2024.1415102), 2024-06-28
Supplement: Data_Sheet_1.pdf [file Data_Sheet_1.pdf]

## Supplemental Materials and Methods

### Cell culture conditions

Sorted Treg populations were cultured in X-VIVO™ 15 Chemically Defined Medium, with gentamicin (Lonza) supplemented with 10% heat inactivated human male AB serum (Sigma-Aldrich) and 10% L-glutamine (HyClone™), 10% sodium pyruvate (Gibco) and 10% non-essential amino acids (NEAA) (ThermoFisher) in the presence of recombinant human IL-2 (rIL-2, Hoffmann-LA Roche Inc) (100 IU/ml for CD4<sup>+</sup> T cells; 500 IU/ml for Tregs), and expanded using Dynabeads® Human T-Activator CD3/CD28 (ThermoFisher) according to the manufacturer's instructions. Tregs were cultured for 12 consecutive days, checked every 6 days for purity by flow cytometry. Treg purity was assessed by staining with anti-FoxP3 (Clone 206D, BioLegend) in eBioscience FoxP3 Transcription Factor staining buffer set (ThermoFisher). Flow cytometry data were collected on an LSRII (Becton Dickinson). FlowJo version v10 software (Treestar) was used for analysis.

βlox5 cells were expanded in low glucose (5.5mM) DMEM (Cellgro), supplemented with 10% FBS (HyClone™) and 1% penicillin-streptomycin (Gibco), 0.02% BSA (Sigma) and 1% non-essential amino acids (NEAA)(Fisher) and 15mM HEPES (Cellgro).

### Terminal deoxynucleotidyl transferase-mediated dUTP nick end labeling (TUNEL) assay

Coverslips (12 mm High performance coverslip, Neuvitro) were coated with Poly-D-Lysine (Gibco) according to manufacturer's protocol. The coated sterile coverslips were placed into 12-well tissue culture plate using sterile forceps.  $0.5 \times 10^5$  βLox5 cells were seeded onto the cover slips for 24 hours. Then  $1 \times 10^6$  CAR-Tregs were added and cocultured with βlox5 cells for 24 hours in mixed Treg and βlox5 media (1:1) in the presence of rIL-2 (100 IU/ml). For detection of apoptosis, the coverslips were stained using the *In situ* Cell Death detection kit (Roche). Briefly, the coverslips were washed once gently with PBS, and then incubated with PE-conjugated HLA-A2 antibody at room temperature for 30 min. The coverslips were washed gently in PBS three times for 5 minutes each and then fixed in 4% paraformaldehyde (PFA) for one hour at room temperature. Samples were then permeabilized with 0.1% Triton X-100, 0.1% sodium citrate, for 2 minutes at room temperature. The slides were rinsed twice with PBS. 50 μl of TUNEL reaction solution (In Situ Cell Death Detection Kit, Roche) was added onto each coverslip and incubated for 1 hour at 37°C in the dark. Samples were embedded with DAPI Fluoromount-G (SouthernBiotech) prior to analysis. Negative controls for TUNEL staining included only 50ul label solution. Finally, the sections were analyzed using Leica SP8 White Light Confocal microscope with a 40X HC PL APO, CS2 oil objective lens (Stanford University Cell Sciences Imaging Facility). Images were evaluated for TUNEL staining using ImageJ. The percentage of TUNEL positive cells was determined as the percent of TUNEL positive cells to total nuclei.

**Table S1** Antibodies used for flow cytometry.

| Target        | Clone     | Fluorochrome     | Vendor         | RRID        |
|---------------|-----------|------------------|----------------|-------------|
| CD3           | OKT3      | Alexa Fluor 488  | BioLegend      | AB_571877   |
| CD3           | OKT3      | APC              | BioLegend      | AB_1937212  |
| CD3           | OKT3      | BV785            | BioLegend      | AB_2563507  |
| CD4           | SK3       | Alexa Fluor 700  | BioLegend      | AB_2563150  |
| CD4           | OKT4      | Alexa Fluor 488  | BioLegend      | AB_571939   |
| CD8           | SK1       | BUV805           | BD Biosciences | AB_2833078  |
| CD8           | SK1       | APC/Cyanine7     | BioLegend      | AB_2044006  |
| CD25          | BC96      | PE/Dazzle™ 594   | BioLegend      | AB_2734260  |
| CD25          | 2A3       | BUV395           | BD Biosciences | AB_2738556  |
| CD127         | A019D5    | PerCP/Cyanine5.5 | BioLegend      | AB_10897104 |
| CD39          | eBioA1    | BV605            | BioLegend      | AB_2750430  |
| CD45RO        | UCHL1     | BUV395           | BD Biosciences | AB_2744410  |
| CD45RO        | UCHL1     | Alexa Fluor 488  | BioLegend      | AB_528823   |
| CD62L         | DREG-56   | PE-Cy7           | BioLegend      | AB_830801   |
| PD-1          | NAT105    | BV785            | BioLegend      | AB_2721562  |
| Tim-3         | F38-2E2   | PE/Dazzle™ 594   | BioLegend      | AB_2565886  |
| LAG-3         | 11C3C65   | BV650            | BioLegend      | AB_2632951  |
| FOXP3         | 206D      | BV421            | BioLegend      | AB_2565972  |
| IL-10         | JES3-19F1 | APC-R700         | BD Biosciences | AB_2870004  |
| IFN- $\gamma$ | 4S.B3     | BV605            | BioLegend      | AB_2563881  |
| TNF- $\alpha$ | Mab11     | APC              | BioLegend      | AB_315264   |
| IL-4          | MP4-25D2  | PE               | BioLegend      | AB_315129   |
| Granzyme B    | GB11      | Alexa Fluor 647  | BioLegend      | AB_2566333  |
| Granzyme B    | QA16A02   | APC/Fire™ 750    | BioLegend      | AB_2728377  |
| HLA-A2        | BB7.2     | PE               | BioLegend      | AB_1877227  |

|        |             |                  |                   |            |
|--------|-------------|------------------|-------------------|------------|
| HLA-A2 | BB7.2       | APC              | BioLegend         | AB_2561567 |
| PD-L1  | 29E.2A3     | PE-Cy7           | BioLegend         | AB_2561687 |
| CD209  | 9E9A8       | Alexa Fluor 647  | BioLegend         | AB_1186092 |
| CD14   | M5E2        | APC/Fire™ 750    | BioLegend         | AB_2632660 |
| CD163  | GHI/61      | PerCP/Cyanine5.5 | BioLegend         | AB_2228986 |
| CD16   | 3G8         | BUV395           | BD Biosciences    | AB_2744293 |
| CD206  | 19.2        | BUV805           | BD Biosciences    | AB_2871334 |
| CD11c  | Bu15        | BV421            | BioLegend         | AB_2564485 |
| CD11b  | ICRF44      | BV605            | BioLegend         | AB_2562021 |
| CD86   | IT2.2       | BV785            | BioLegend         | AB_2616794 |
| HLA-DR | L243        | PE/Dazzle™ 594   | BioLegend         | AB_2563646 |
| HPx1   | HIC0-3B3    | DyLight 405      | Novus Biologicals |            |
| HPi2   | HIC1-2B4.2B | Alexa Fluor 647  | Novus Biologicals |            |

## Supplemental Figures

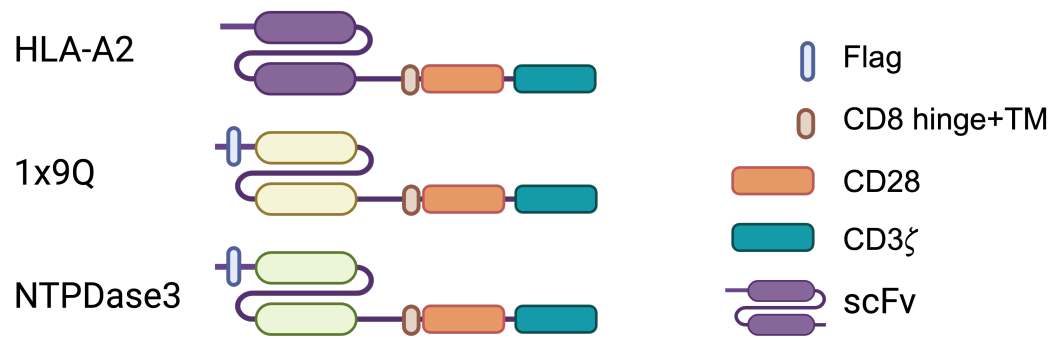

Figure S1 | Domain structures of HLA-A2, 1x9Q and NTPDase3 CARs.

**A**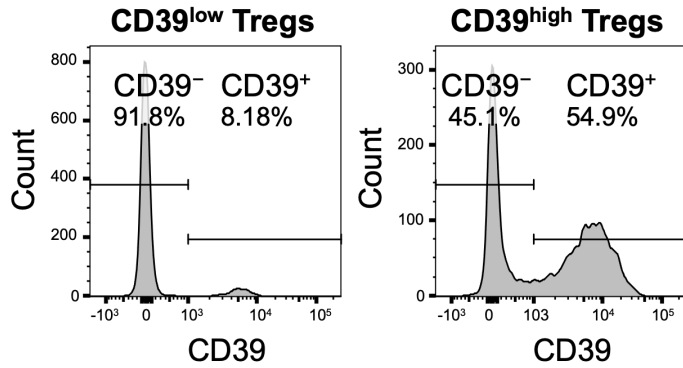**B**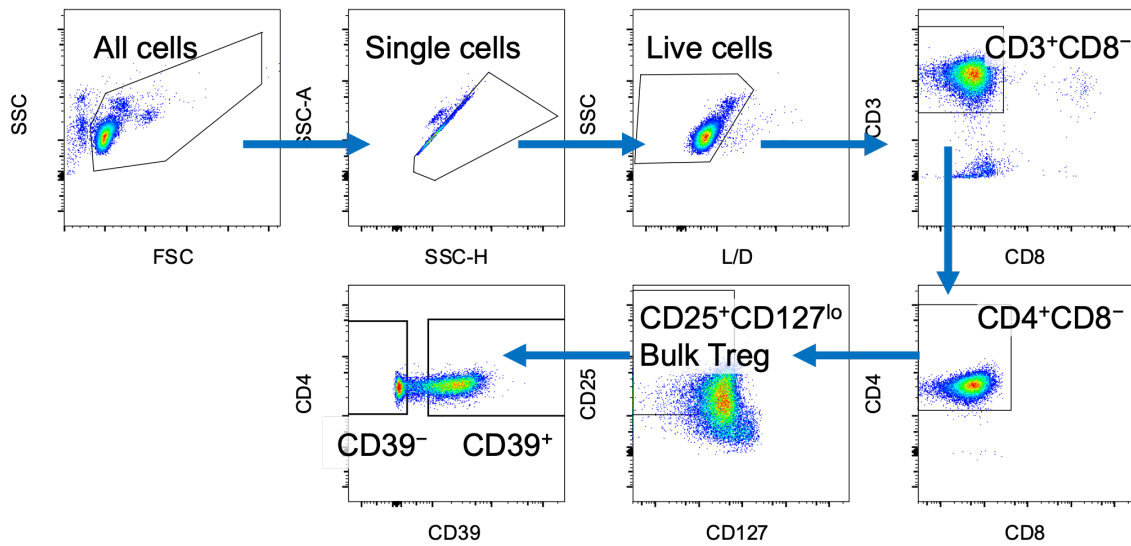

### Figure S2 | Treg subset definition and FACS sort gating hierarchy

(A) Bulk Tregs with low frequency of CD39<sup>+</sup> Treg cells is defined as CD39<sup>low</sup> Tregs, the others with high frequency of CD39<sup>+</sup> Treg cells is defined as CD39<sup>high</sup> Tregs. (B) Bulk Tregs were gated as CD3<sup>+</sup>CD4<sup>+</sup>CD8<sup>-</sup>CD25<sup>+</sup>CD127<sup>low</sup>, and then sorted into CD39<sup>+</sup> and CD39<sup>-</sup> Treg subsets.

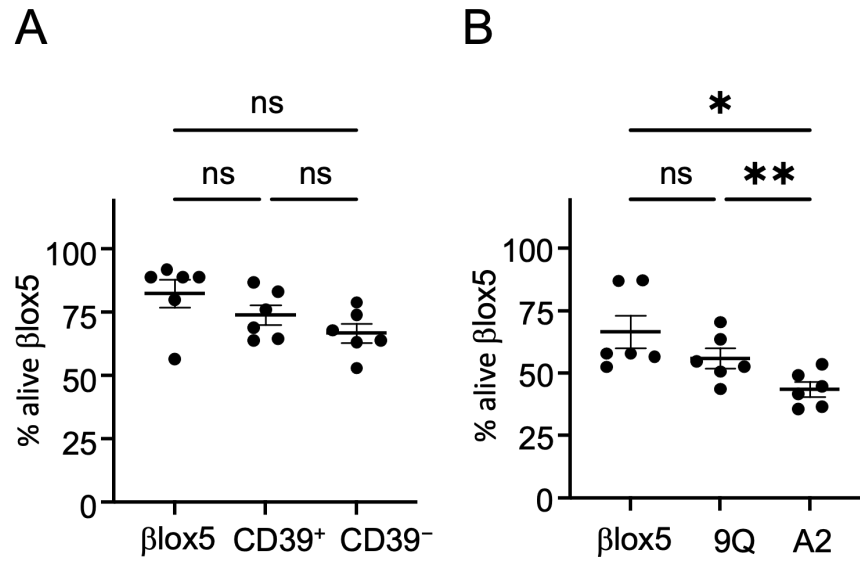

**Figure S3 | Introduction of HLA-A2-CAR induced cytotoxicity of Tregs to βlox5 cells. (A)** Expanded but unmodified CD39<sup>+</sup> and CD39<sup>-</sup> Tregs were co-cultured with βlox5 cells for 24 hours. Cells were harvested, and viability was assessed by flow cytometric analysis of 7-AAD and Annexin V staining. Percent of viable cells (AnnexinV<sup>-</sup> 7-AAD<sup>-</sup>) was graphed (mean ± SEM, n=6). **(B)** Expanded bulk Tregs were transfected with 1x9Q or A2-CARs and co-cultured as above. Viability was assessed and analyzed as in A. (mean ± SEM, n=6). \*  $P < 0.05$ , \*\*  $P < 0.01$ , \*\*\*  $P < 0.001$ , \*\*\*\*  $P < 0.0001$ ; ns, not significant by one-way ANOVA, Tukey's multiple comparisons test.

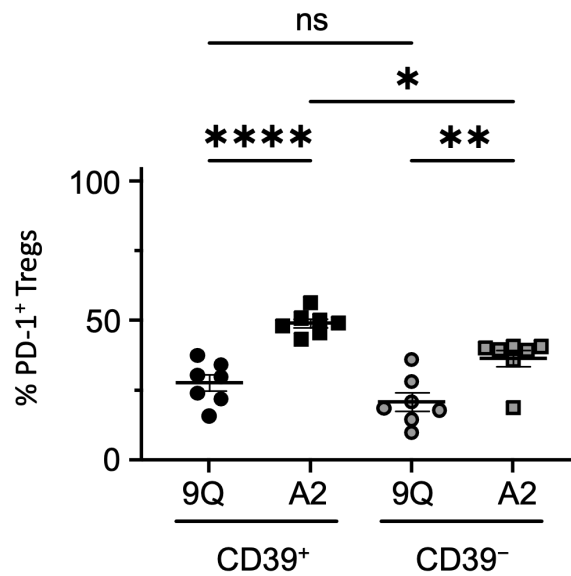

**Figure S4 | HLA-A2 CAR expressing Tregs increased PD-1 expression when co-cultured with  $\beta$ lox5 cells.** Expanded CD39<sup>+</sup> and CD39<sup>-</sup> Tregs were transfected with 1x9Q or A2-CARs and co-cultured with  $\beta$ lox5 cells for 24 hours. PD-1 expression was measured in live Treg cells by flow cytometry. Percent of PD-1<sup>+</sup> Treg cells was graphed (mean  $\pm$  SEM, n=7). \*  $P < 0.05$ , \*\*  $P < 0.01$ , \*\*\*  $P < 0.001$ , \*\*\*\*  $P < 0.0001$ ; ns, not significant by one-way ANOVA, Tukey's multiple comparisons test.

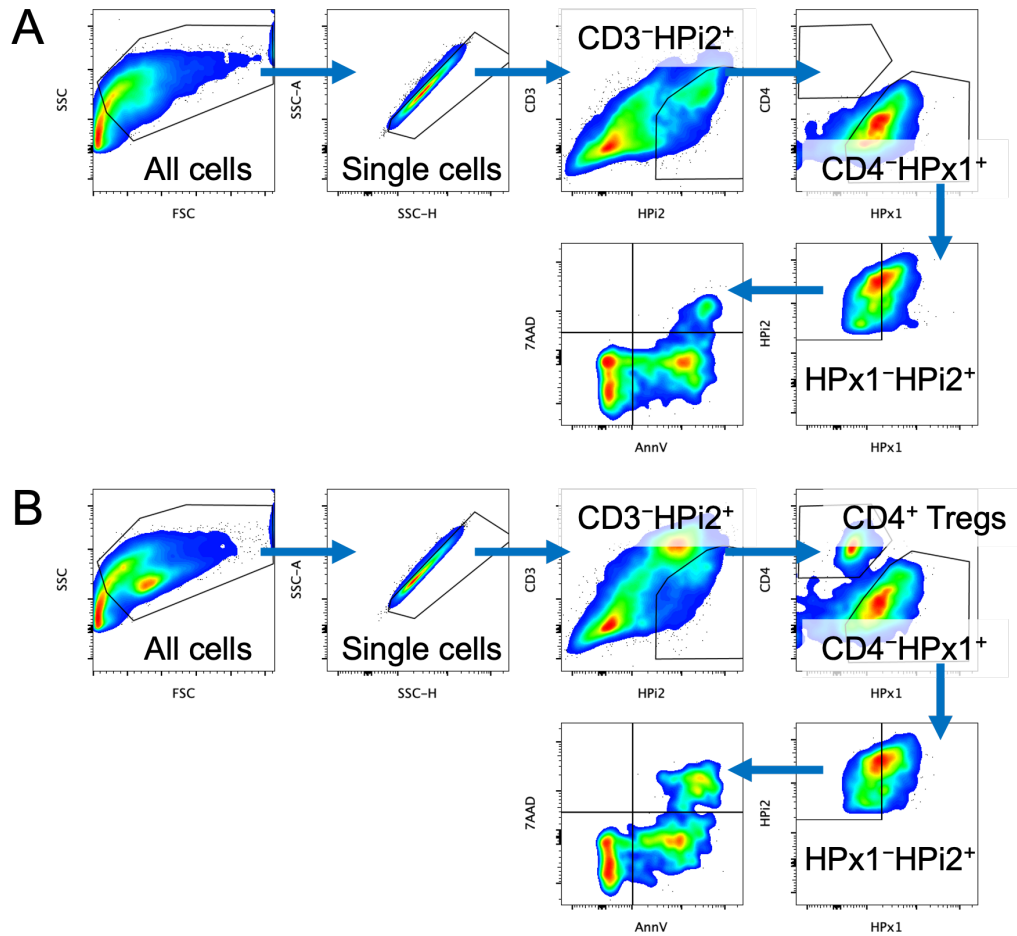

**Figure S5 | Gating hierarchy for apoptosis analysis of islet endocrine cells.**

**(A)** Dispersed islet cells only were stained for CD3, CD4, HPx1 and HPi2, and then stained with 7AAD/Annexin V to assess apoptosis. Islet endocrine cells were identified as CD3<sup>-</sup> CD4<sup>-</sup> HPx1<sup>-</sup> HPi2<sup>+</sup> cells. **(B)** Dispersed islet cells were co-cultured with CAR Tregs for 48 hours and then analyzed as in **A**.
